# Supplementary material for: A Systematic Review and Meta-Analysis of Symptoms of Anxiety, Depression, and Insomnia in Spain in the COVID-19 Crisis
Source: MDPI journal article supplement (doi:10.3390/ijerph19021018), 2022-01-17
Supplement: s1 [file s1]

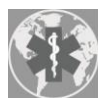

## Supplementary material

**Table S1. Study characteristics for mental health symptoms in COVID-19 epidemic in Spain.**

| Characteristics           | Total Number of Studies/Samples * | Percent (%)   | Level of Analysis |
|---------------------------|-----------------------------------|---------------|-------------------|
| <i>Overall</i>            | 28/38                             | 100           |                   |
| <i>Design</i>             |                                   |               | Study             |
| Cohort                    | 4                                 | 14.29         |                   |
| Cross-sectional           | 24                                | 85.71         |                   |
| <i>Publication status</i> |                                   |               | Study             |
| Preprint                  | 2                                 | 7.14          |                   |
| Published                 | 26                                | 92.86         |                   |
| <i>Quality</i>            |                                   |               | Study             |
| >6                        | 7                                 | 25.0          |                   |
| Between 5 and 6           | 21                                | 75.0          |                   |
| <5                        | 0                                 | 0.0           |                   |
| <i>Population</i>         |                                   |               | Sample            |
| Frontline HCW             | 3                                 | 7.89          |                   |
| General population        | 30                                | 78.95         |                   |
| Student                   | 5                                 | 13.16         |                   |
| <i>Outcome#</i>           |                                   |               | Prevalence        |
| Anxiety                   | 52                                | 47.1          |                   |
| Depression                | 52                                | 47.1          |                   |
| Insomnia                  | 5                                 | 4.59          |                   |
| <i>Severity#</i>          |                                   |               | Prevalence        |
| Above mild                | 39                                | 35.78         |                   |
| Above moderate            | 30                                | 27.52         |                   |
| Severe                    | 23                                | 21.1          |                   |
| Overall                   | 17                                | 15.6          |                   |
|                           | Median (mean)                     | Range         |                   |
| <i>Sample size</i>        | 1199 (2272)                       | 44 - 21207    | Sample            |
| <i>Response rate</i>      | 70.3% (73.9%)                     | 20.0% - 98.0% | Sample            |
| <i>Female portion</i>     | 70.25% (64.7%)                    | 0% -100%      | Sample            |

\* One study may include multiple independent samples such as frontline HCWs and general population [31]. # The total prevalence of mental health outcomes are larger than the 38 samples because one sample can assess multiple mental health outcomes including anxiety, depression, and insomnia. Similarly, a study may report multiple levels of severity on each mental health outcome for each sample.

**Table S2. The pooled prevalence rates of mental health symptoms by subgroups of population, outcome, and severity.**

| First-Level Subgroup | Second-Level Subgroup       | Prevalence (%) | 95% CI  |
|----------------------|-----------------------------|----------------|---------|
|                      | Aggregated prevalence       | 22%            | 18%–26% |
| <i>Population</i>    | Frontline HCW               | 42%            | 22%–64% |
|                      | General population          | 19%            | 16%–23% |
|                      | Student                     | 50%            | 32%–69% |
| <i>Outcome#</i>      | Anxiety                     | 20%            | 15%–25% |
|                      | Depression                  | 22%            | 18%–28% |
|                      | Insomnia                    | 57%            | 48%–66% |
| <i>Severity#</i>     | Above mild                  | 38%            | 30%–46% |
|                      | Above moderate              | 18%            | 14%–21% |
|                      | Severe                      | 7%             | 5%–9%   |
|                      | Overall                     | 25%            | 16%–34% |
| <i>Quality</i>       | Studies with high quality   | 21%            | 15%–27% |
|                      | Studies with medium quality | 23%            | 19%–27% |

Note: CI = Confidence Interval.
